# Supplementary material for: Exogenous Melatonin Improves Plant Iron Deficiency Tolerance via Increased Accumulation of Polyamine-Mediated Nitric Oxide
Source: PubMed Central journal article supplement (PMC5133778; doi:10.3390/ijms17111777), 2016-10-25
Supplement: ijms-17-01777-s001.pdf [file ijms-17-01777-s001.pdf]

## Supplementary Material: Exogenous Melatonin Improves Plant Iron Deficiency Tolerance via Increased Accumulation of Polyamine-Mediated Nitric Oxide

Cheng Zhou, Zhi Liu, Lin Zhu, Zhongyou Ma, Jianfei Wang and Jian Zhu

Table S1. Primers used in this study.

| Gene   | Usage | Sequence                                          |
|--------|-------|---------------------------------------------------|
| ADC1   | qPCR  | 5'CGGTTCTGCCATTGGTCTC<br>5'GAACAGAGATGTTCCCGGA    |
| ADC2   | qPCR  | 5'CACACAGCTTTGCAGTGACC<br>5'TACGGCATGTTGTGGAACGA  |
| FIT1   | qPCR  | 5'CCAACACCTGTCGATGACCT<br>5'TTCACCACCGGCTCTAACAC  |
| FRO2   | qPCR  | 5'GCTTTGGTTATGGTGTGCGG<br>5'TCCCAGCTTTTGCTTCATCTC |
| IRT1   | qPCR  | 5'TCTTGAAGAGAACCCGTGGC<br>5'GGTAACATCATTGCGGGGC   |
| ACTIN2 | qPCR  | 5'GAAATCACAGCACTTGCA<br>5'AGCCTTTGATCTTGAGAG      |

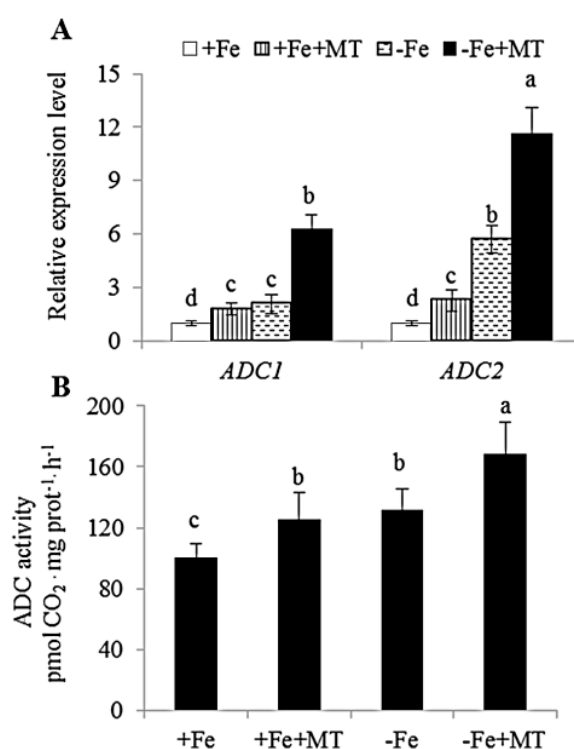

**Figure S1.** Effects of exogenous melatonin on the expression of ADC biosynthetic genes and the activities of ADC in *Arabidopsis* plants. 7-day-old seedlings were treated with or without 5  $\mu$ M melatonin under -Fe and +Fe conditions for 8 day. These plants were then sampled to analyze the transcription levels of *ADC1* and *ADC2* (A), and the activities of ADC (B). Each bar is the mean  $\pm$  SE of at least three replicates, and different lowercase letters above the bars indicate significant difference using Tukey's test at  $p < 0.05$ .
